# Supplementary material for: Sun exposure patterns of urban, suburban, and rural children: a dosimetry and diary study of 150 children
Source: Royal Society of Chemistry journal article supplement (doi:10.1039/c5pp00052a), 2015-05-18

## **Supplementary Material**

**Table S1. Demographic data.**

|                                               | Residential area |                  |                  |
|-----------------------------------------------|------------------|------------------|------------------|
| Participants                                  | Rural            | Suburban         | Urban            |
| <b>N</b>                                      | <b>61</b>        | <b>45</b>        | <b>44</b>        |
| <b>Age in years, mean (range)<sup>1</sup></b> | <b>11 (5-19)</b> | <b>12 (5-19)</b> | <b>11 (4-18)</b> |
| <b>Gender (%)<sup>2</sup></b>                 |                  |                  |                  |
| <b>Female</b>                                 | <b>51</b>        | <b>60</b>        | <b>61</b>        |
| <b>Male</b>                                   | <b>49</b>        | <b>40</b>        | <b>39</b>        |
| <b>Skin type (%)<sup>2</sup></b>              |                  |                  |                  |
| <b>I</b>                                      | <b>8</b>         | <b>13</b>        | <b>11</b>        |
| <b>II</b>                                     | <b>51</b>        | <b>24</b>        | <b>32</b>        |
| <b>III</b>                                    | <b>26</b>        | <b>40</b>        | <b>36</b>        |
| <b>IV</b>                                     | <b>15</b>        | <b>22</b>        | <b>21</b>        |
| <b>Hair color (%)<sup>2</sup></b>             |                  |                  |                  |
| <b>Red</b>                                    | <b>7</b>         | <b>7</b>         | <b>7</b>         |
| <b>Light blond</b>                            | <b>56</b>        | <b>44</b>        | <b>57</b>        |
| <b>Dark blond</b>                             | <b>25</b>        | <b>20</b>        | <b>21</b>        |
| <b>Brown</b>                                  | <b>13</b>        | <b>29</b>        | <b>14</b>        |
| <b>Black</b>                                  | <b>0</b>         | <b>0</b>         | <b>2</b>         |
| <b>Eye color (%)<sup>2</sup></b>              |                  |                  |                  |
| <b>Blue</b>                                   | <b>57</b>        | <b>56</b>        | <b>61</b>        |
| <b>Green</b>                                  | <b>8</b>         | <b>9</b>         | <b>7</b>         |
| <b>Gray</b>                                   | <b>16</b>        | <b>16</b>        | <b>11</b>        |
| <b>Hazel brown</b>                            | <b>13</b>        | <b>18</b>        | <b>14</b>        |
| <b>Dark brown</b>                             | <b>5</b>         | <b>2</b>         | <b>7</b>         |

<sup>1</sup> No significant differences between groups (rural/suburban/urban) (One-Way ANOVA test), (p>0.05)

<sup>2</sup> No significant differences between groups (rural/suburban/urban) (Chi Square test), (p>0.05)

Figure legend

**Figure S1. Risk behavior and exposure of girls and boys**

Boxplots show number of risk days (intentional sunbathing, exposure of shoulders to the sun performing activities such as playing in the garden, or using a solarium) (a) and daily personal UVR exposure in SED on risk days (b), according to residential area (urban/suburban/rural) and gender. The box length represents the interquartile range, while the line in the box represents the median. The whiskers represent the value of 1.5 x the height of the box. Outliers are marked with a circle and extreme outliers with an asterisk. Red squares represent girls and green squares represent boys.

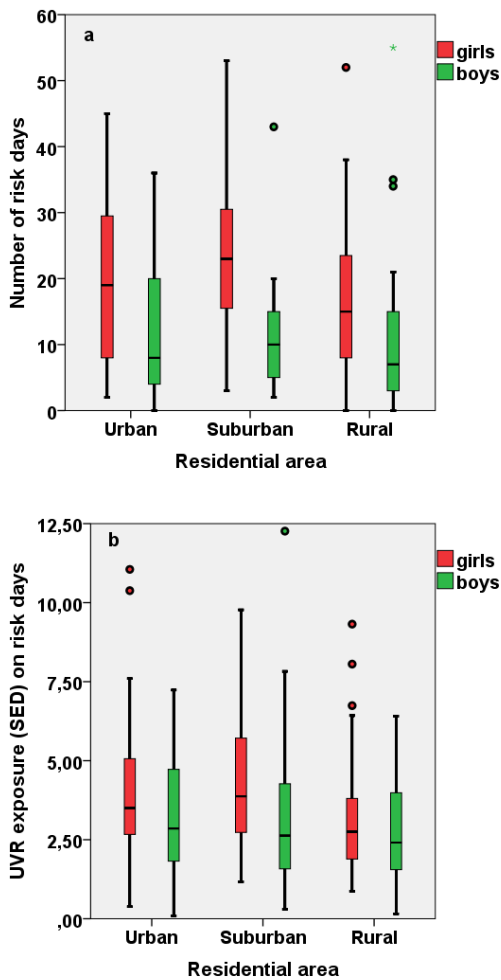

Supplement: c5pp00052a1.pdf [file c5pp00052a1.pdf]
